# Supplementary material for: Impaired synaptic clustering of postsynaptic density proteins and altered signal transmission in hippocampal neurons, and disrupted learning behavior in PDZ1 and PDZ2 ligand binding-deficient PSD-95 knockin mice
Source: PubMed Central journal article supplement (PMC3575367; doi:10.1186/1756-6606-5-43), 2012-12-26

Additional file 1

Figure S1

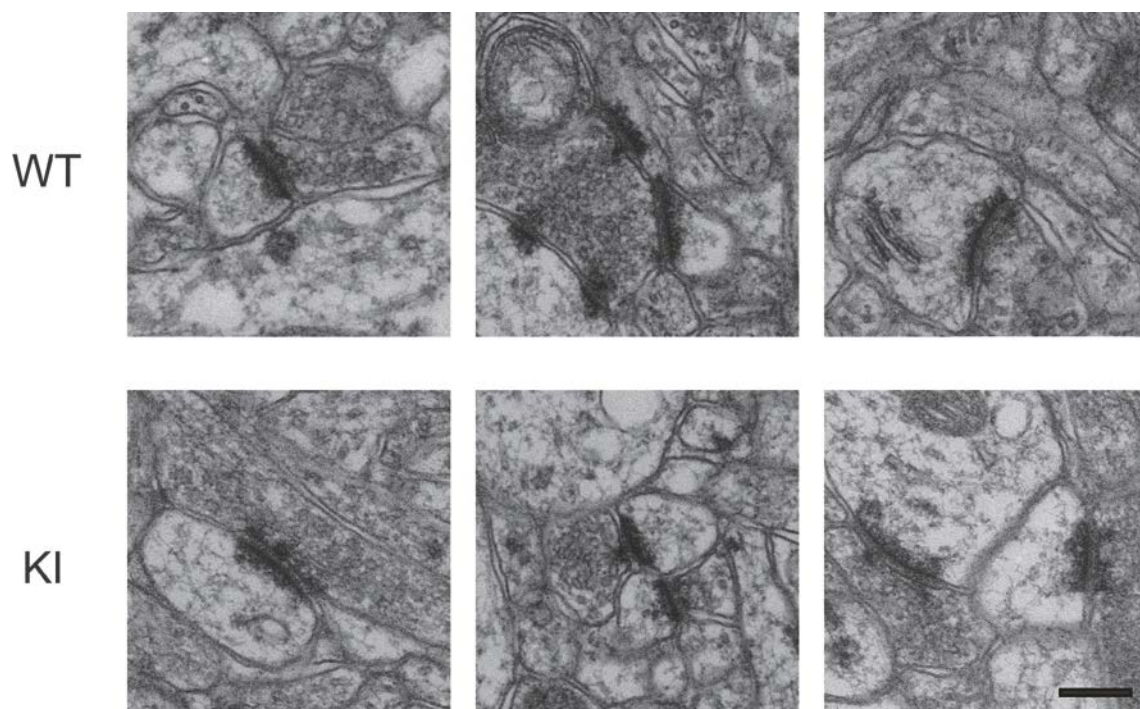

Figure S2

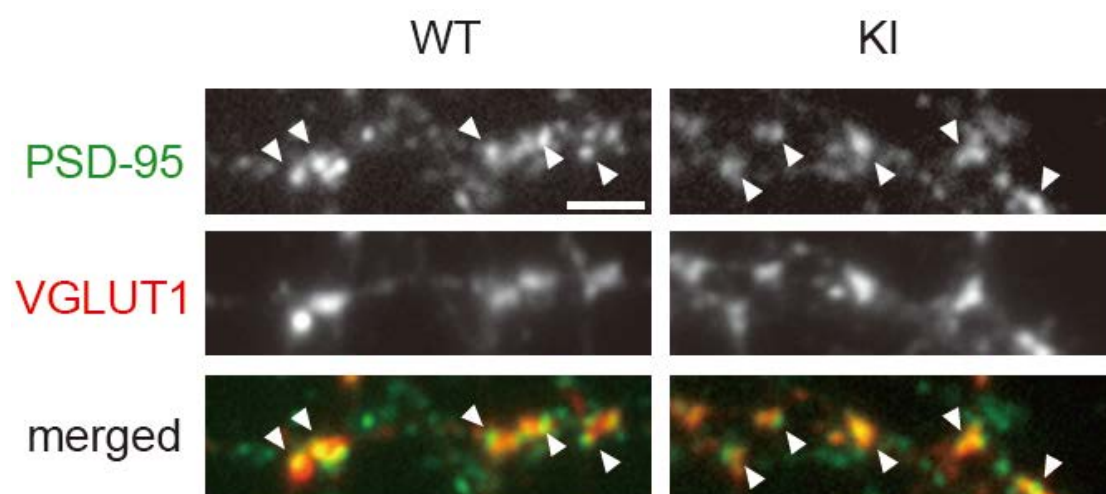

Figure S3

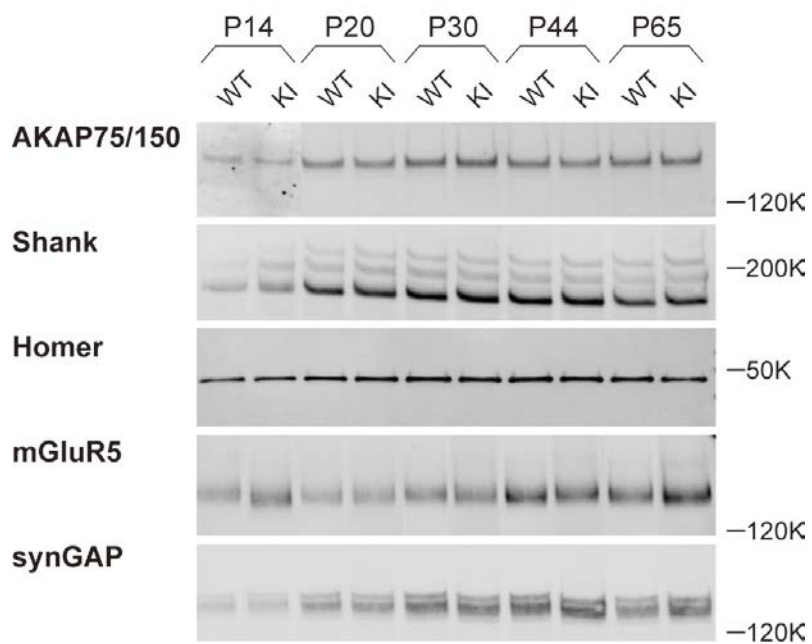

Figure S4

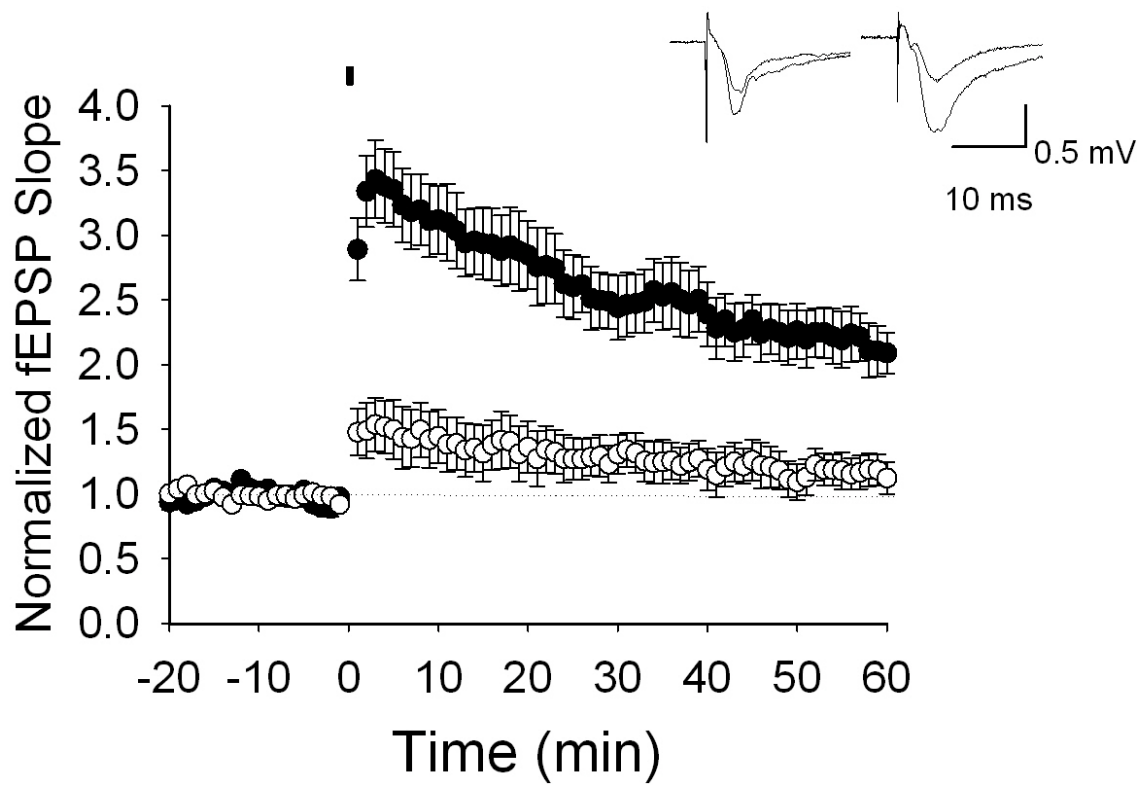

Figure S5

I. Y-maze test

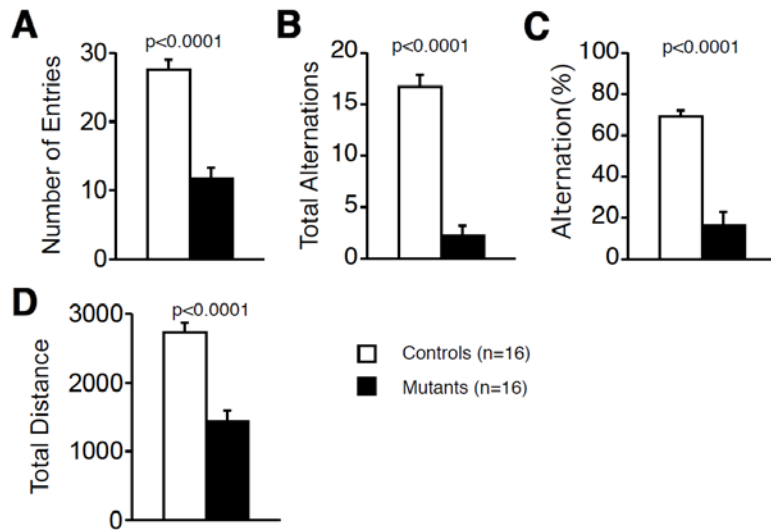

II. Social interaction test

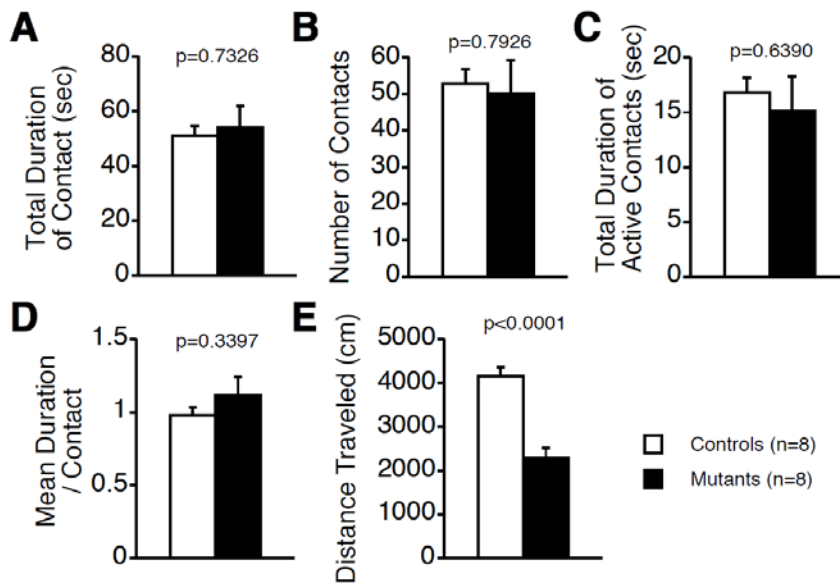

### III. Three chamber social interaction

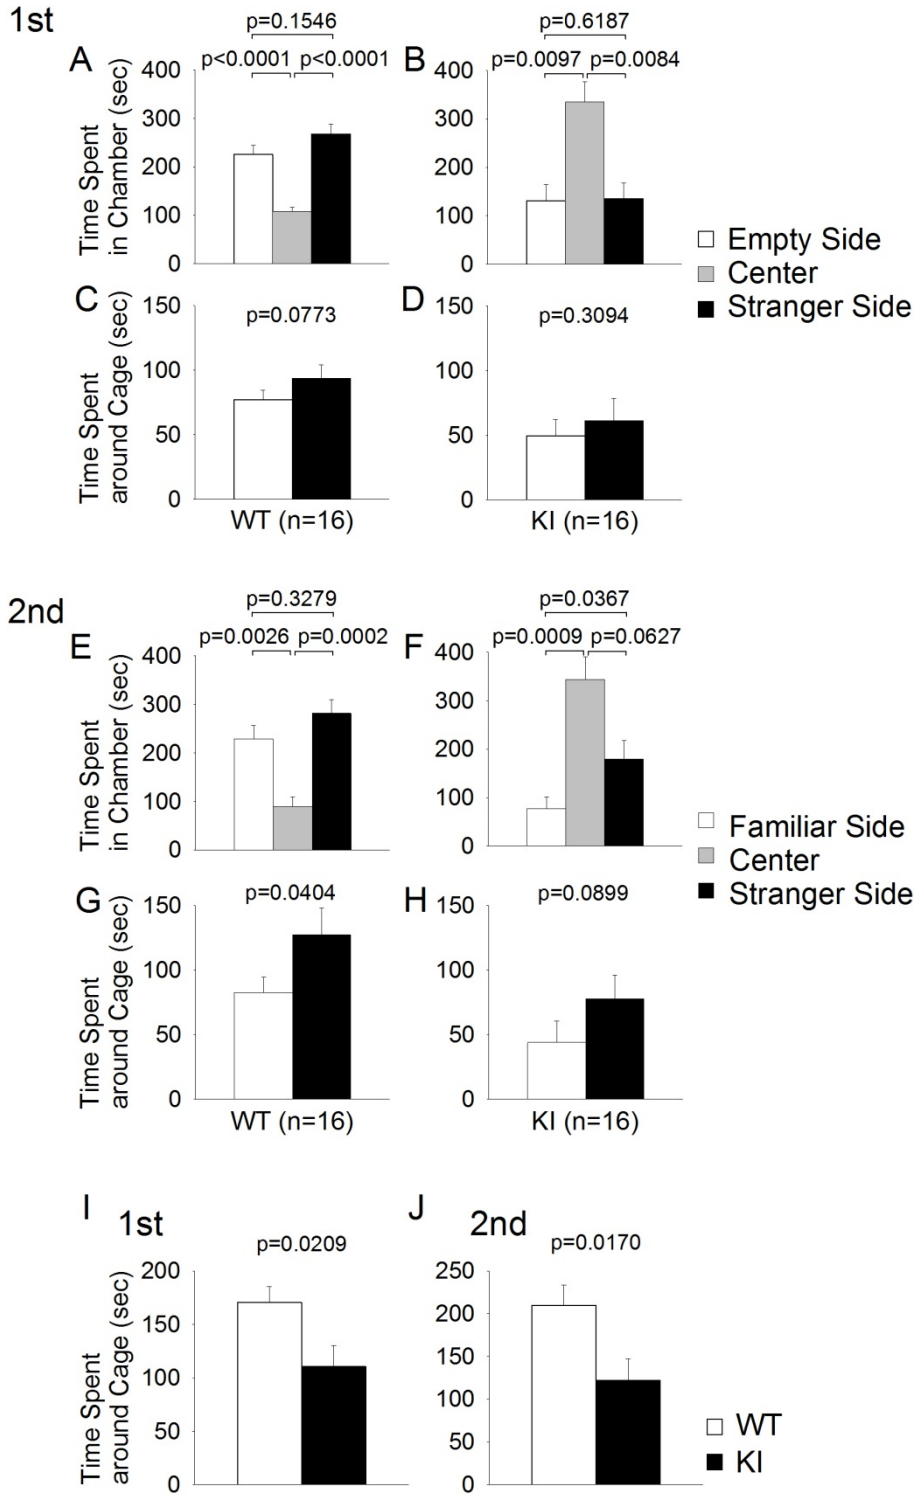

Supplement: 1756-6606-5-43-S1.pdf [file 1756-6606-5-43-S1.pdf]
